# Supplementary material for: Persistent phosphinyl radicals from a bulky diphosphine: an example of a molecular jack-in-the-box
Source: Royal Society of Chemistry journal article supplement (doi:10.1039/b004889p), 2000-01-01
Supplement: b004889p.doc [file b004889p.doc]

# SUPPLEMENTARY MATERIAL

Persistent Phosphinyl Radicals from a Bulky Diphosphine: An Example of a Molecular Jack-in-the-Box

Sarah L. Hinchley,a Carole A. Morrison,a David W. H. Rankin,a* Charles L. B. Macdonald,b Robert J. Wiacek, b Alan H. Cowley,b Michael F. Lappert,c Grete Gundersen,d Jason A. C. Clyburne,e and Philip P. Power.f

*a Department of Chemistry, University of Edinburgh, West Mains Road, Edinburgh,*

*EH9 3JJ.*

*b Department of Chemistry and Biochemistry, The University of Texas at Austin, Austin, Texas 78712, U.S.A.*

*c School of Chemistry, Physics and Environmental Sciences, University of Sussex, Falmer, Brighton, BN1 9RH.*

*d Department of Chemistry, University of Oslo, Box 1033, Blindern, N-0315 Oslo, Norway.*

*e Department of Chemistry, Acadia University, Wolfville, NS, B0P 1X0, Canada.*

*f Department of Chemistry, The University of California, Davis, Davis, California 95616, U.S.A.*

**GED data for 2**: Electron scattering intensities for **2** were recorded on Kodak Electron Image plates using the Balzers’ gas electron diffraction apparatus in Oslo operating at *ca*. 41.5 kV (electron wavelength *ca.* 0.058 Å). Nozzle-to-plate distances for the metal inlet nozzle were *ca.* 248 and 498 mm, yielding data in the *s* range 1.5-29 Å-1. Three plates were exposed at the long distance and five at the short distance and the sample and nozzle temperatures were maintained at 420 K during the exposure periods. The scattering patterns of benzene were used for the purpose of calibration of the electron wavelength. The electron-scattering patterns were converted into digital form using a Joyce Loebl microdensitometer. The programs used for data reduction[[1]](#endnote-2) and least-squares refinement[[2]](#endnote-3) have been described previously; the complex scattering factors were those listed by Ross *et al*.[[3]](#endnote-4)

**Summary of Theoretical Results**

All calculations done with the Gaussian 94[[4]](#endnote-5) package of programs using either the B3LYP[[5]](#endnote-6) or UB3LYP DFT approach with a 6-311G* basis set for P and 6-31G* basis sets on all other atoms. All calculations were performed using the resources of the U.K. Computational Chemistry Facility, on a DEC 8400 superscalar cluster equipped with 10 fast processors, 6 GB of memory and 150 GB disk. “Diphosphine” refers to (*syn,anti*-P[CH(SiMe3)2]2) and “radical” refers to P[CH(SiMe3)2]2.

| Conformational Description | Label | Energy / a.u. | Relative Energy / (kJ/mol) | P-P Bond Energy / (kJ/mol) |
| --- | --- | --- | --- | --- |
| Diphosphine, Single Point Energy† | **1** | -4111.49606999 | 258.00 (1/2 of **1**) | 95.88 |
| syn,anti-radicals, Single Point Energy† | 1A1 | -2055.73639389 | 288.56 |  |
|  | 1A2 | -2055.72315900 | 323.31 |  |
| syn,anti-radicals, H Optimized, Heavy Atoms Fixed‡ | 1B2 | -2055.81424078 | 84.18 |  |
| syn,anti-radicals, Fully Optimized§ | 1C2 | -2055.83386190 | 32.66 |  |
| syn,syn-radicals, Fully Optimized§ | **2** | -2055.84630210 | 0 |  |

† All atoms in the experimentally determined positions.

‡ Heavy atoms fixed in experimentally determined positions, H atoms allowed to optimize.

§ All atoms allowed to optimize.

1. S. Cradock, J. Koprowski and D. W. H. Rankin, *J. Mol. Struct.*, **1981**, *77*, 113. [↑](#endnote-ref-2)
2. C. M. Huntley, G. S. Laurenson and D. W. H. Rankin, *J. Chem. Soc.*, *Dalton Trans*., **1980**, 954. [↑](#endnote-ref-3)
3. A. M. Ross, M. Fink and R. Hilderbrandt, in *International Tables for Crystallography,* Ed. A. J. C. Wilson, Vol. C, Kluwer Academic Publishers, Dortrecht, 1992, p. 245. [↑](#endnote-ref-4)
4. Frisch, M. J.; Trucks, G. W.; Schlegel, H. B.; Gill, P. M. W.; Johnson, B. G.; Robb, M. A.; Cheeseman, J. R.; Keith, T. A.; Petersson, G. A.; Montgomery, J. A.; Raghavachari, K.; Al-Laham, M. A.; Zakrewski, V. G.; Ortiz, J. V.; Foresman, J. B.; Cioslowski, J.; Stefanow, B. B.; Nanayakkara, A.; Challacombe, M.; Peng, C. Y.; Ayala, P. Y.; Chen, W.; Wong, M. W.; Andres, J. L.; Replogle, E. S.; Gomperts, R.; Martin, R. L.; Fox, D. J.; Binkley, J. S.; DeFrees, D. J.; Baker, J.; Stewart, J. P.; Head-Gordon, M.; Gonzalez, C.; Pople, J. A. GAUSSIAN 94 (Revision B.2) (Gaussian, Inc.; Pittsburgh PA, 1995). [↑](#endnote-ref-5)
5. (a) A. D. Becke, *J. Chem. Phys.*, **1993**, *98*, 5648. (b) A. D. Becke, *Phys. Rev. A*, **1988**, *38*, 3098. (c) C. Lee, W. Yang, and R. G. Parr, *Phys. Rev. B*, **1988**, *37*, 785. (d) S. H. Vosko, L. Wilk, and M. Nusair, *Can. J. Phys.*, **1980**, *58*, 1200. [↑](#endnote-ref-6)
